# Supplementary material for: Do COVID-19 and Food Insecurity Influence Existing Inequalities between Women and Men in Africa?
Source: MDPI journal article supplement (doi:10.3390/ijerph19042065), 2022-02-12
Supplement: s1 [file s1]

## Supplementary File S1

Rapid review PRISMA flowchart results for: How do Covid-19 and food insecurity influence existing inequalities between women and men in Africa? (search 'a' was conducted in March 2021, search 'b' in October 2021).

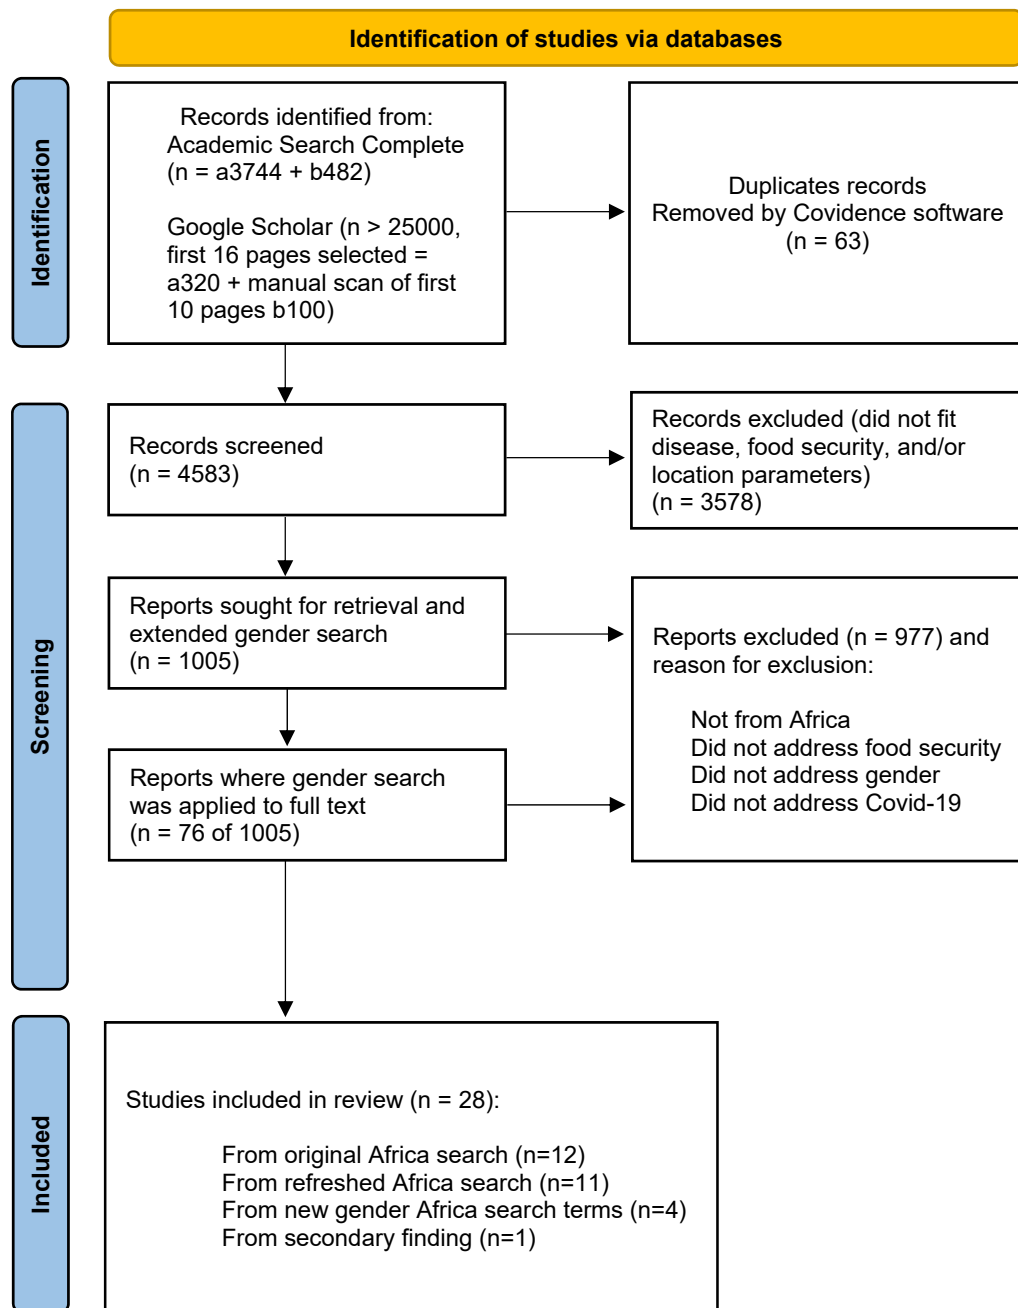

Adapted From: Page MJ, McKenzie JE, Bossuyt PM, Boutron I, Hoffmann TC, Mulrow CD, et al. The PRISMA 2020 statement: an updated guideline for reporting systematic reviews. BMJ 2021;372:n71. doi: 10.1136/bmj.n71.
